# Supplementary material for: Dual Oxidase 2 (DUOX2) as a Proteomic Biomarker for Predicting Treatment Response to Chemoradiation Therapy for Locally Advanced Rectal Cancer: Using High-Throughput Proteomic Analysis and Machine Learning Algorithm
Source: MDPI journal article supplement (doi:10.3390/ijms232112923), 2022-10-26
Supplement: s1 [file s1]

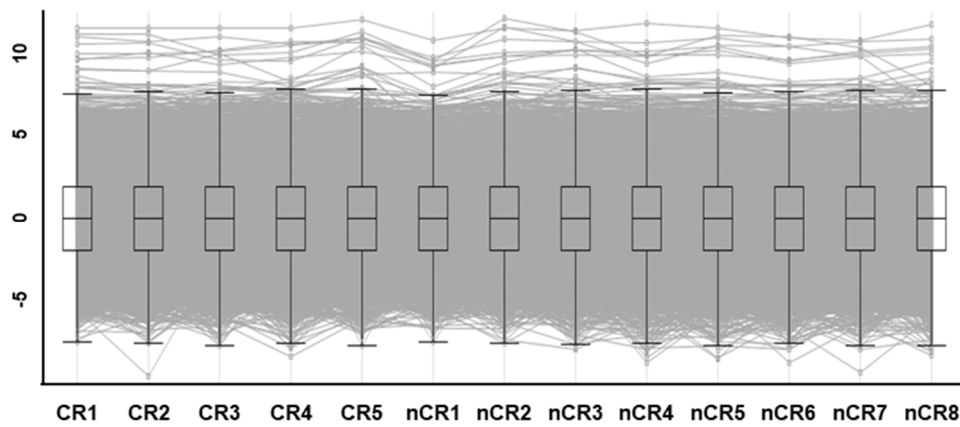

(A)

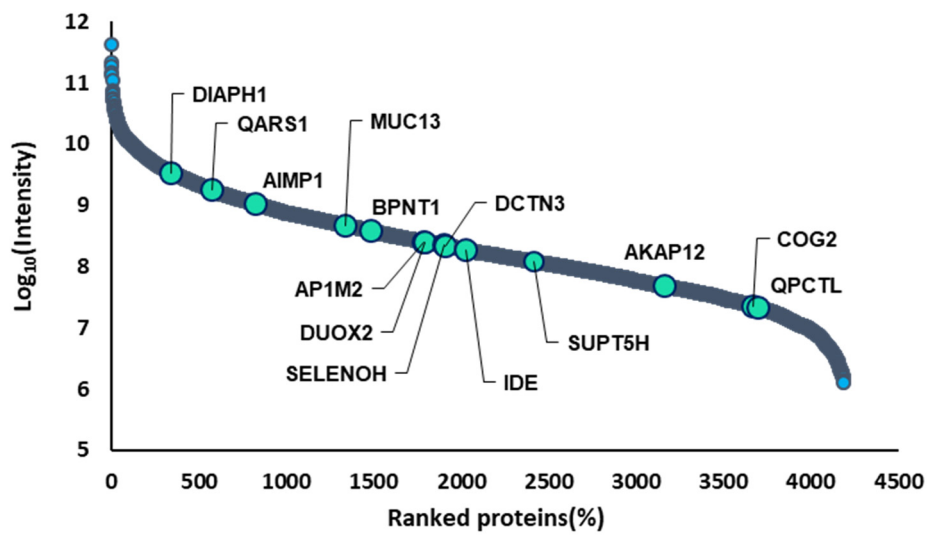

(B)

**Figure S1. (A) Normalization of protein expression.** Data were normalized using width adjustment for all values in a sample. **(B) Dynamic range of quantified proteins.** Distribution of expression intensities of quantified proteins show a large dynamic range of abundance, but most of the proteins were expressed within eight orders of magnitude. Several proteins, including DUOX2, were quantified.
